# Supplementary material for: Multilevel carbon composite construction of NASICON-type NaVPO4F/C/CNT cathode material for enhanced-performance sodium-ion batteries
Source: Royal Society of Chemistry journal article supplement (doi:10.1039/d4tc04746j), 2025-01-01
Supplement: d4tc04746j1.pdf [file d4tc04746j1.pdf]

## Supporting Information

### **Multilevel carbon composite construction of NASICON type NaVPO<sub>4</sub>F/C/CNT cathode material for enhanced- performance sodium ion batteries**

Kang Tang<sup>a</sup>, Hualing Tian<sup>a</sup>, Yanhui Zhang<sup>a</sup>, Yanjun Cai<sup>a</sup>, Hong Du<sup>a</sup>,  
Mofan Zhu<sup>a</sup>, Xiang Yao<sup>a\*</sup>, Zhi Su<sup>a,b\*\*</sup>

<sup>a</sup> College of Chemistry and Chemical Engineering, Xinjiang Key Laboratory of Energy Storage and Photoelectrolytic Materials, Xinjiang Normal University, PR China

<sup>b</sup> Xinjiang University, PR China

---

\* Corresponding author.

\*\* Corresponding author.

E-mail addresses: yaoxiangxjnu@163.com (X. Yao), suzhixj@163.com (Z. Su).

## Experimental section

### Material synthesis

The NaVPO<sub>4</sub>F/C/CNT<sub>x</sub> (x=5%, 10%, 15%) was synthesized via the sol-gel method followed by high-temperature calcination. 3 mmol V<sub>2</sub>O<sub>5</sub> and 1.5(1-x) g H<sub>2</sub>C<sub>2</sub>O<sub>4</sub>·2H<sub>2</sub>O were added to the beaker and stirred at 70°C for 1 h. The mixture was then supplemented with 6 mmol NaF, 6 mmol NH<sub>4</sub>H<sub>2</sub>PO<sub>4</sub>, and a specific quantity of CNT, followed by stirring for 5 h to yield a dark green gel. Subsequently, the gel was subjected to drying at 90°C for 12 h. The precursor was heat-treated in a tube furnace at 350°C in an argon atmosphere for 4 h, then the temperature was raised to 750°C for 8 h to obtain the target product NVPF/C/CNT<sub>x</sub> (x =5%, 10%, and 15%). The preparation process of NVPF/C samples was the same as above, without adding CNT.

### Material characterization

The crystal structure of the sample was characterized by X-ray diffraction (XRD, Cu K $\alpha$ , Bruker D2). The microstructure of the sample was analyzed using scanning electron microscopy (SEM, Thermo Scientific Apreo 2C) and high-resolution transmission electron microscopy (HR-TEM, Talos F200S G2). The specific surface area of the material was determined by an automatic physical adsorption instrument (BET, ASAP 2020 PLUS). The carbonized sample's graphitization degree was analyzed using a Raman spectroscopy (Thermo Scientific DXR3xi). The valence states and elemental proportions were determined using X-ray photoelectron spectroscopy (XPS, Thermo Scientific K-Alpha X). The carbon content of the material is analyzed by a thermogravimetric analyzer (TG, STA-2500). The functional group composition of the sample was characterized by Fourier transform infrared spectrometer (FTIR, NICOLET iS50).

### Electrochemical measurement

The manufacturing of the active pole piece is mixed by the active material, acetylene black, polyvinylidene fluoride under the mass ratio (8:1:1), dropping N-methyl pyrrolidone as a sol. After fully grinding and mixing, the slurry is evenly coated on the aluminum foil. The aluminum foil is transferred to the vacuum drying oven at 80 °C for 12 h. After being dried, it is cut into a circular pole sheet with a diameter of 12 mm, and the active material loading of the pole sheet is approximate 2.0 mg·cm<sup>-1</sup>. The CR2032 button half-cells were assembled in the glove box filled with high purity

argon gas. On the LAND Battery Test System (CT2100A), the half battery is subjected to a constant current charge and discharge test. Cyclic voltammetry (CV) curves and electrochemical impedance spectroscopy (EIS) were determined by a CHI760E electrochemical workstation. The full cell is assembled with hard carbon as anode material and NVPF/C/CNT10% as cathode material. The hard carbon was obtained by assembling a half-cell battery with sodium as the counter electrode at a current density of  $30 \text{ mA g}^{-1}$  after 3 cycles.

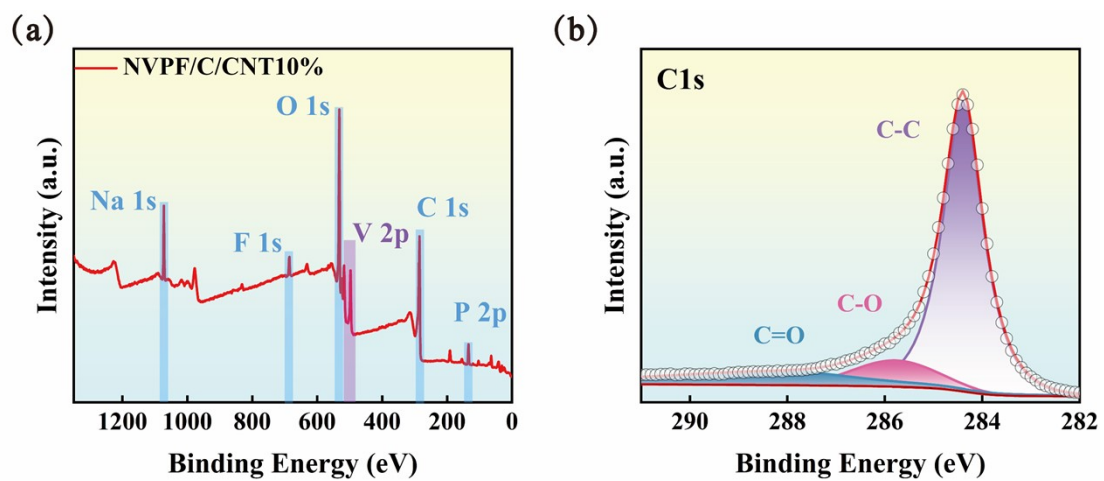

Figure S1. (a) XPS survey spectra of NVPF/C/CNT10%; (b) C 1s XPS spectra.

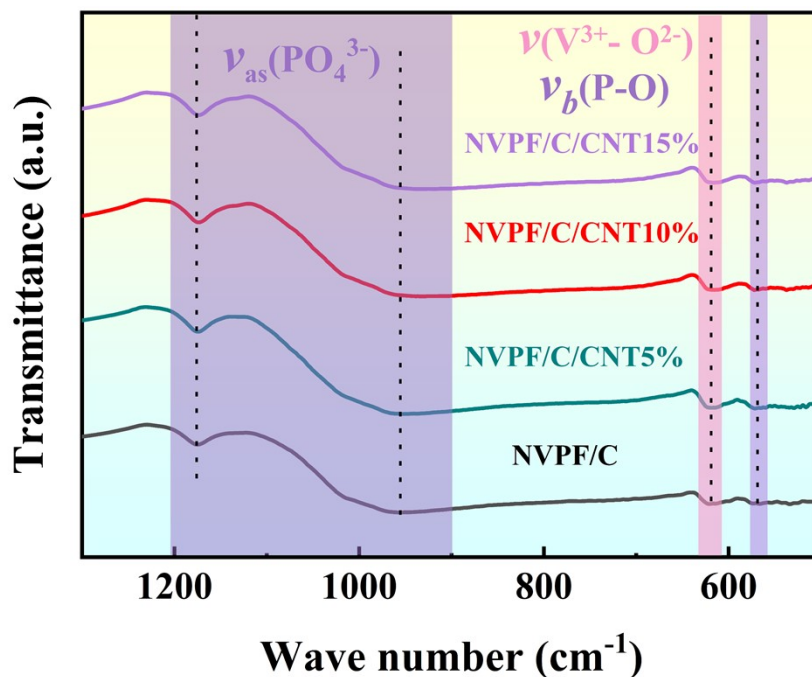

**Figure S2.** FTIR spectra of the four samples

FTIR spectroscopy offered critical information on the molecular structure. According to the FTIR spectra (**Figure S2**), the bands observed in the 1150~1250 cm<sup>-1</sup> range can be attributed to the stretching vibrations of the PO<sub>4</sub> group. Furthermore, the P-O asymmetric stretching vibrations of PO<sub>4</sub><sup>3-</sup> are clearly at 580 and 973 cm<sup>-1</sup>, while the peak at 632 cm<sup>-1</sup> corresponds to the V<sup>3+</sup>-O<sup>2-</sup> bond vibration within the VO<sub>4</sub>F<sub>2</sub> octahedron. Notably, the characteristic peaks of V<sup>5+</sup> (760, 950 cm<sup>-1</sup>) and V<sup>4+</sup> (919, 956 cm<sup>-1</sup>) were absent in all four NVPF samples. This observation indicates that V<sup>5+</sup> has been fully reduced to V<sup>3+</sup> in all samples.

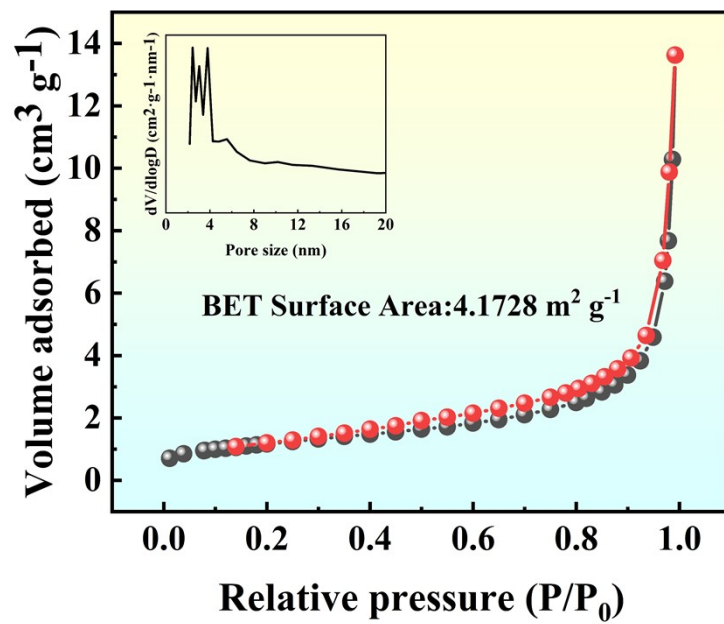

Figure S3. BET/BJH curves for NVPF/C sample.

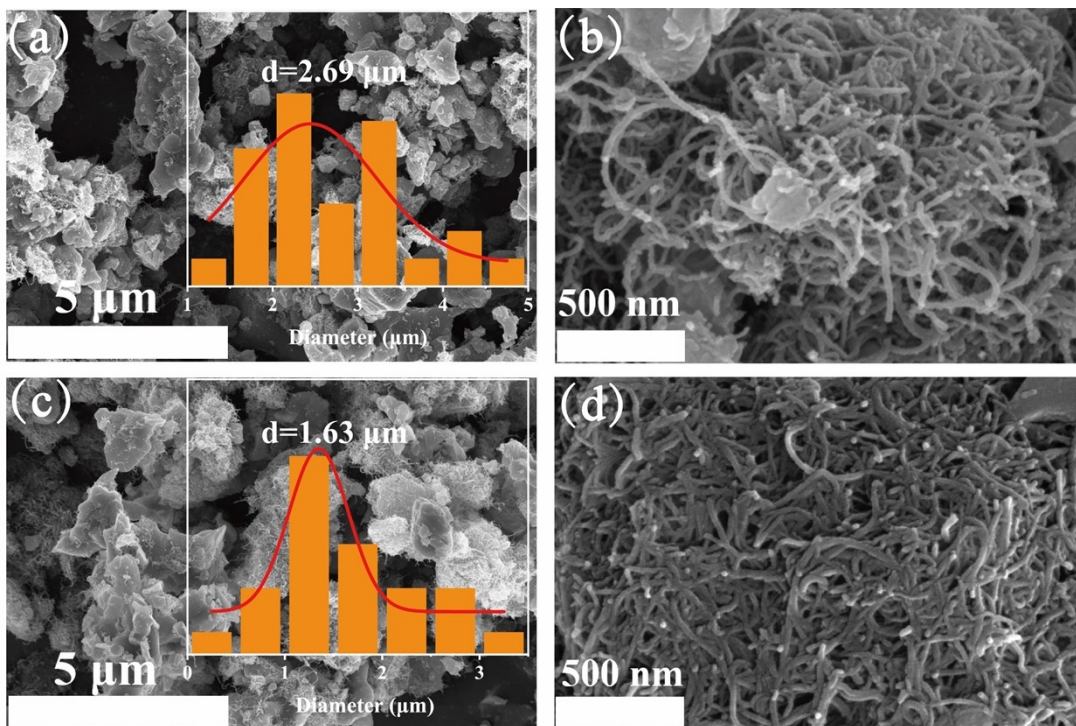

**Figure S4.** SEM images of (a-b) NVPF/C/CNT5%; (c-d) NVPF/C/CNT15%.

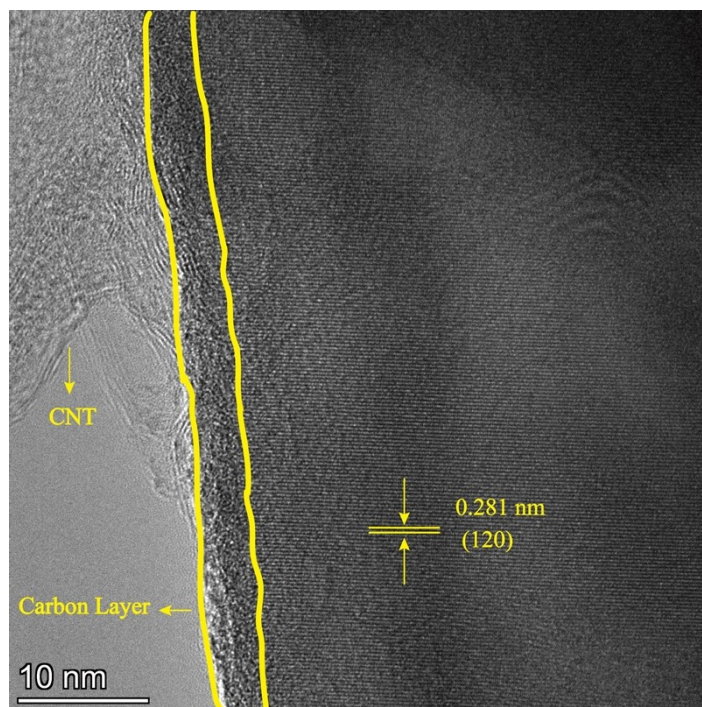

**Figure S5.** HRTEM images of NVPF/C/CNT10%.



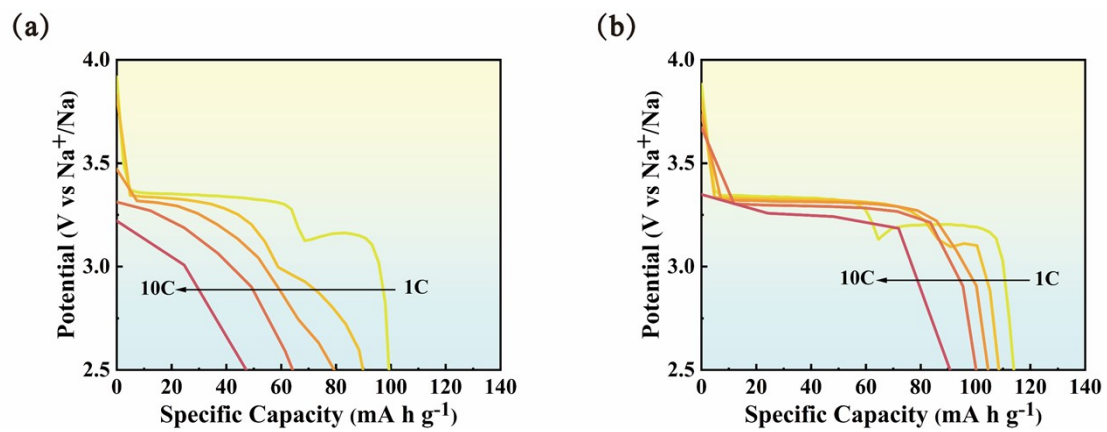

**Figure S6.** GCD curves of (a) NVPF/C and (b) NVPF/C/CNT10% at different rates.

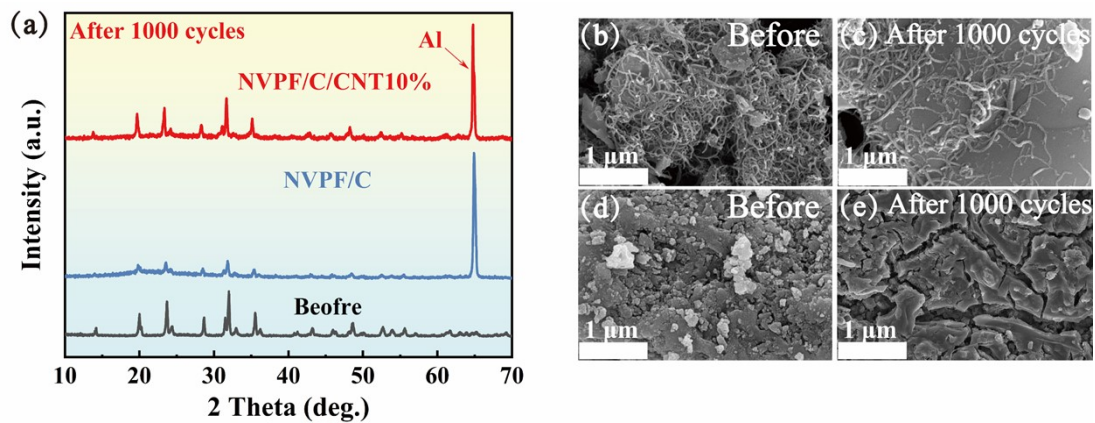

**Figure S7.** (a) Comparison of XRD patterns for NVPF/C and NVPF/C/CNT10% materials before and after Cycling; Comparison of SEM images before and after cycling (b-c) NVPF/C/CNT10%; (d-e) NVPF/C.

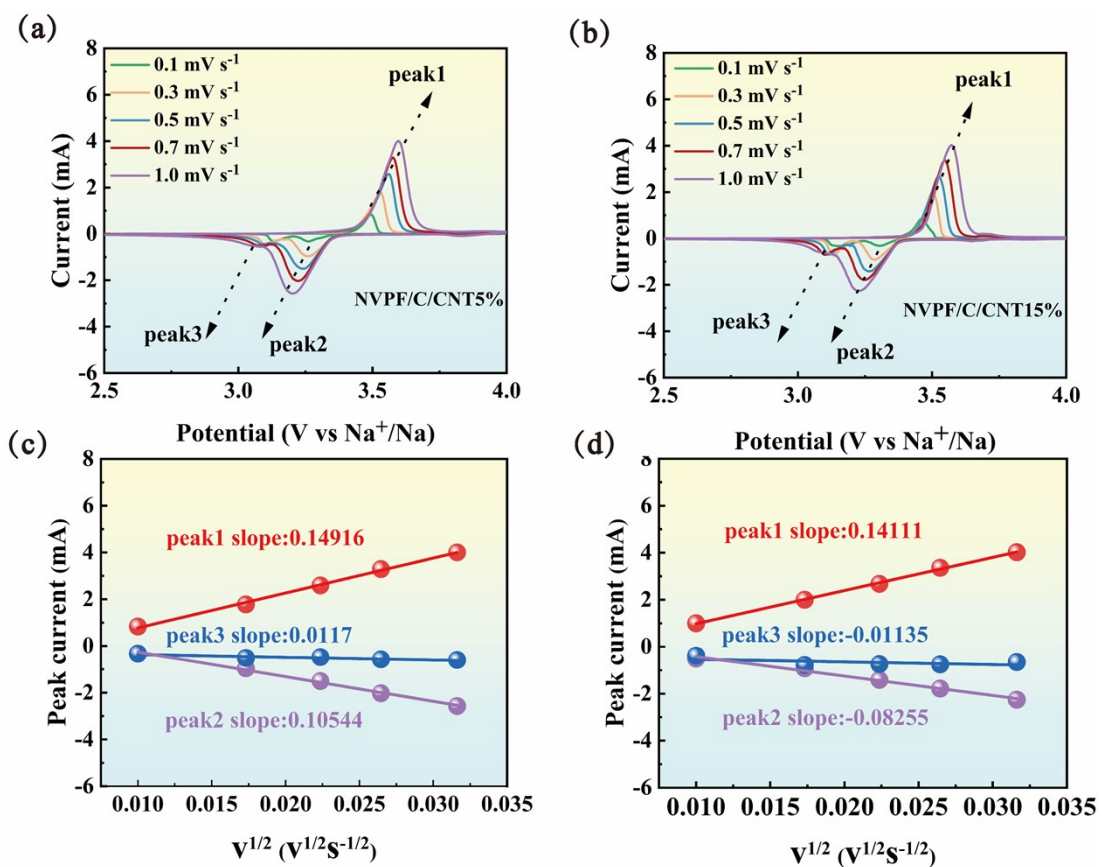

**Figure S8.** The CV curves obtained at various scanning rates (a) NVPF/C/CNT5%; (b) NVPF/C/CNT15%; Linear fitting graph of  $i_p$  and  $v^{1/2}$  based on different sweep speeds (c) NVPF/C/CNT5%; (d) NVPF/C/CNT15%.

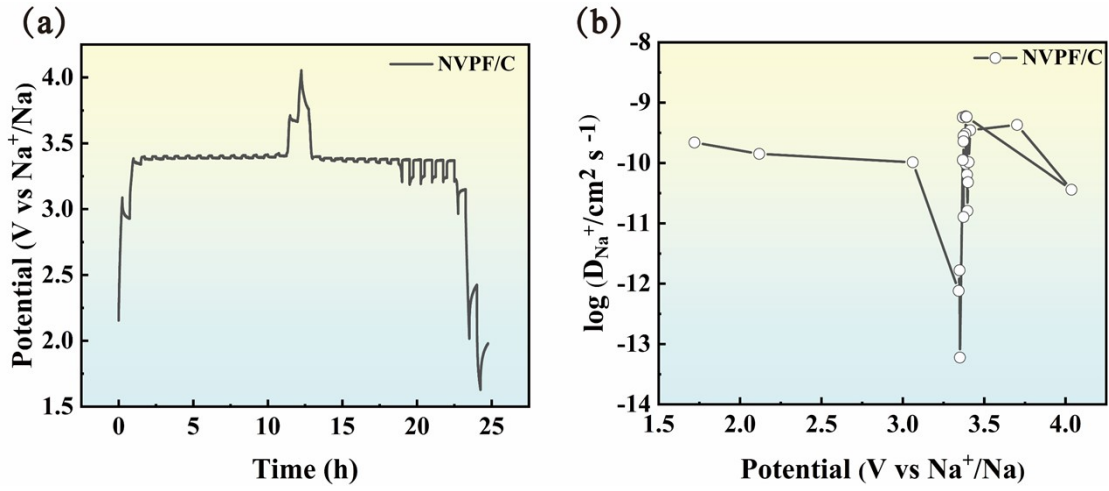

**Figure S9.** (a) GITT curve of NVPF/C; (b)  $D_{Na^+}$  of NVPF/C .

Before measuring the GITT, the battery was charged/discharged at 0.2 C for three cycles, then charged/discharged at constant voltage for 15 minutes, and left for 30 minutes to obtain a stable state. The calculation of  $D_{Na^+}$  is based on the formula:

$$D_{Na^+} = \frac{4}{\pi} \left( \frac{mVm}{MA} \right)^2 \left( \frac{\Delta E_s}{\Delta E_\tau} \right)^2 \quad (S1.2)$$

Among them, the ionic diffusion coefficient ( $\text{cm}^2 \text{s}^{-1}$ ), the mass of the electrode active substance (g), the molar molecular weight ( $\text{g mol}^{-1}$ ), the molar volume of the cathode material ( $\text{cm}^3 \text{mol}^{-1}$ ), the area of the electrode ( $\text{cm}^2$ ), the voltage change of the electrode during A charge/discharge time (V) and the voltage difference between the two transients before and after charge/discharge (V) can be represented by  $D_{Na^+}$ ,  $m$ ,  $M$ ,  $V_m$ ,  $A$ ,  $\Delta E_\tau$ , and  $\Delta E_s$ , respectively.

Table S1 Comparison of half cell electrochemical performance with recent literature results.

| Samples                      | Rate | Cycle | First Capacity | Final Capacity | Retention | Ref       |
|------------------------------|------|-------|----------------|----------------|-----------|-----------|
| NVPF@5% rGO                  | 5    | 1000  | 83.2           | 78.2           | 94        | 1         |
| C-NaVPO <sub>4</sub> F       | 1    | 400   | 94.5           | 84.7           | 94.5      | 2         |
| NaVPO <sub>4</sub> F@C-750°C | 2    | 300   | 116.2          | 103.6          | 89.2      | 3         |
| 15-SC@NVPF                   | 0.5  | 1000  | 104            | 100.8          | 97        | 4         |
| NVPF/C/CNT10%                | 5    | 1000  | 107.7          | 83.9           | 77        | This work |

1. Zhao, C. Guo, J. Gu, Z. Zhao, X. Li, W. Yang, X. Liang, H. Wu, X., Robust three-dimensional carbon conductive network in a NaVPO<sub>4</sub>F cathode used for superior high-rate and ultralong-lifespan sodium-ion full batteries. *Journal of Materials Chemistry A* **2020**, 8, 17454-17462.
2. Bin, D. Wang, Y. Tamirat, A. G. Zhu, P. Yang, B. Wang, J. Huang, J. Xia, Y., Stable High-Voltage Aqueous Zinc Battery Based on Carbon-Coated NaVPO<sub>4</sub>F Cathode. *ACS Sustainable Chemistry & Engineering* **2021**, 9, 3223-3231.
3. Zuo, Y. Yue, J. Ma, Z. Zuo, Z., Facile fabrication of carbon-encapsulated NaVPO<sub>4</sub>F nanocomposite as a high-rate and long-cycle life cathode material for sodium energy storage. *Journal of Physics and Chemistry of Solids* **2022**, 160, 110354.
4. Kumar, V. K. Ghosh, S. Biswas, S. Martha, S. K., Pitch-Derived Soft-Carbon-Wrapped NaVPO<sub>4</sub>F Composite as a Potential Cathode Material for Sodium-Ion Batteries. *ACS Applied Energy Materials* **2021**, 4, 4059-4069.
